1 **Factors associated with normal linear growth among pre-school children living in better-off**  
2 **households: a multi-country analysis of nationally representative data**

3

4 Dickson A. Amugsi<sup>1\*¶</sup>, Zacharie T. Dimbuene<sup>2, 3&</sup>, Elizabeth W. Kimani-Murage<sup>1&</sup>

5

6

7 <sup>1</sup>Maternal and Child Wellbeing Unit, Research Division, African Population and Health Research  
8 Center, Nairobi, Kenya

9 <sup>2</sup>Department of Population Sciences and Development, University of Kinshasa, Democratic  
10 Republic of the Congo

11 <sup>3</sup>Microdata Access Division, Statistics Canada, Ottawa, Canada

12

13 \* Corresponding author

14 Email: [damugsi2002@yahoo.com](mailto:damugsi2002@yahoo.com); [damugsi@aphrc.org](mailto:damugsi@aphrc.org) (DAA)

15 ¶These authors contributed equally to this work

16 &These authors also contributed equally to this work

17

18

19

20

21

22

23

24

25 **Abstract**

26 This study examined the factors associated with normal linear growth among pre-school  
27 children living in better-off households, using survey data from Ghana, Kenya, Nigeria,  
28 Mozambique and Democratic Republic of Congo (DRC). The primary outcome variable was child  
29 height-for-age z-scores (HAZ), categorised into HAZ $\geq$ -2SD (normal growth/not stunted) and  
30 HAZ $<$ -2 (stunted). Using logistic regression, we estimated adjusted odds ratios (aORs) of the  
31 factors associated with normal growth. Higher maternal weight (measured by body mass index)  
32 was associated with increased odds of normal growth in Mozambique, DRC, Kenya and Nigeria.  
33 A unit increase in maternal years of education was associated with increased odds in normal  
34 growth in DRC (aOR=1.06, 95% CI=1.03, 1.09), Ghana (aOR=1.08, 95% CI=1.04, 1.12),  
35 Mozambique (aOR=1.08, 95% CI=1.05, 1.11) and Nigeria (aOR=1.07, 95% CI=1.06, 1.08). A year  
36 increase in maternal age was positively associated with normal growth in all the five countries.  
37 Breastfeeding was associated with increased odds of normal growth in Nigeria (aOR= 1.30, 95%  
38 CI=1.16, 1.46) and Kenya (aOR=1.37, 95% CI=1.05, 1.79). Children of working mothers had 25%  
39 (aOR=0.75, 95% CI=0.60, 0.93) reduced odds of normal growth in DRC. A unit change in  
40 maternal parity was associated with 10% (aOR=0.90, 95% CI=0.84, 0.97), 23% (aOR=0.77, 95%  
41 CI=0.63, 0.93), 25% (aOR=0.75, 95% CI=0.69, 0.82), 6% (aOR=0.94, 95% CI=0.89, 0.99) and 5%  
42 (aOR=0.95, 95% CI=0.92, 0.99) reduced odds of normal growth in DRC, Ghana, Kenya,  
43 Mozambique and Nigeria respectively. A child being a male was associated with 16%  
44 (aOR=0.82, 95% CI=0.68, 0.98), 40% (aOR=0.60, 95% CI=0.40, 0.89), 37% (aOR=0.63, 95%  
45 CI=0.51, 0.77) and 21% (aOR=0.79, 95% CI=0.71, 0.87) reduced odds of normal child growth in

46 DRC, Ghana, Kenya and Nigeria respectively. In conclusion, maternal education, weight, age,  
47 breastfeeding and antenatal care are positively associated with normal child growth, while  
48 maternal parity, employment, and child sex and age are associated negatively with normal  
49 growth. Interventions to improve child growth should take into account these differential  
50 effects.

51 **Key words:** Normal growth, stunting, factors, sub-Saharan Africa, rich households

52

53

54

55

56

57

58

59

60

61

62

63

64

## 65 **Introduction**

66 Child health is a fundamental public health issue because good child health sets one up for life-  
67 long health and functioning, and wellbeing. In sub-Saharan Africa (SSA), child physical health is  
68 of particular concern due to the high rates of illness and mortality in the region. Child normal  
69 (healthy) growth, defined in this paper as children who are not stunted (not too short for their  
70 age), is a foundation for optimal child health and wellbeing. There is evidence that healthy child  
71 growth is positively associated with cognitive development, higher school achievements, lower  
72 morbidity and mortality, higher economic productivity in adulthood and better maternal  
73 reproductive outcomes (1-3). Thus, suggesting the need for substantial investment in nutrition  
74 interventions to promote child growth to ensure life-long benefits. Working with international  
75 partners such as WHO and UNICEF, governments of SSA have put in place various interventions  
76 to improve child growth by addressing stunting in the region (4, 5). However, the  
77 implementation of these programmes tends to focus more on child growth deficiencies and  
78 how to protect children against risk factors of growth deficiencies (6, 7). Therefore, it may be  
79 difficult to directly attribute the effects of the programmes on child healthy growth outcomes,  
80 except to infer that reduction in stunting implies an increase in healthy growth. The present  
81 study fills this gap by providing robust evidence on the critical factors associated with healthy  
82 growth among children living in better-off households. Indeed, many experts have called for  
83 this type of resource-focused approach in promoting child health outcomes, as exemplified by  
84 the UNICEF childcare framework (8, 9).

85

86 Several factors affect child linear growth in low and middle incomes countries (LMICs). These  
87 factors include maternal education, employment, household wealth index, antenatal care  
88 (ANC), parity, maternal body mass index (BMI), urban place of residence, breastfeeding, and  
89 maternal age among others (10-30). These factors affect child linear growth either negatively or  
90 positively. There is substantial evidence that improvement in maternal education has a  
91 significant positive effect on child growth outcomes in many settings (10-14). Educated mothers  
92 tend to have children with better nutritional status compared to children of mothers with no  
93 education.

94

95 Similarly, maternal BMI has a strong positive effect on child linear growth (10, 11, 14-17). A  
96 study in Ethiopia showed that maternal BMI was associated positively with children nutritional  
97 status (17). Fenske and colleagues (11) observed that maternal age has a significant effect on  
98 childhood stunting. In India, undernutrition was more prevalent in children of 26-30 year age  
99 group mothers than the other reproductive age groups (18). Relatedly, children of older  
100 mothers tend to suffer less from stunting compared to children of younger mothers (12, 19,  
101 20). Although there is scanty literature on the effects of maternal parity on child nutritional  
102 status, some few studies have observed negative associations between maternal parity and  
103 child growth (21-23). Further, Kuhnt and Vollmer(24) found in their study that having at least  
104 four ANC visits is associated with reduced odds of stunting in pre-school children. Several  
105 studies have observed a positive effect of breastfeeding on child growth (25-27). Household

106 wealth index also has a strong positive impact on child growth (28-30). Children in better-off  
107 households tend to have better growth outcomes relative to those in poor households.

108

109 The literature reviewed above focus almost exclusively on child growth deficiencies  
110 (undernutrition/abnormal growth) and the associated risk factors. Statistical analyses that  
111 examine the direct relationship between sociodemographic factors and healthy child growth  
112 are still limited, to the best of our knowledge. Therefore, it is significant to conduct analysis,  
113 using healthy growth as the primaryr outcome variable to elucidate the direct relationship  
114 between sociodemographic factors and healthy linear growth among children. Furthermore, it  
115 is widely recognised that children in better-off households tend to have better growth and  
116 health outcomes. However, stratified analysis to understand the key covariates responsible for  
117 the positive growth outcomes in this sub-group is lacking. This study intended to fill this gap by  
118 stratifying the analysis by better-off households, focusing on children who are growing normally  
119 (rather than those that are not) and the factors that make them grow well. We also  
120 investigated the factors that pose potential risks to child growth in better-off households. This  
121 investigation will further our understanding of the critical factors associated with healthy child  
122 growth. The objective of this study, therefore, is to examine the associations between  
123 sociodemographic factors at child, maternal, household and community levels and healthy  
124 growth among children living in better-off households.

125

126

127 **Methodology**

128 *Data sources and sampling strategy*

129 This analysis used data from the Demographic and Health Surveys (DHS) (31), conducted in  
130 Ghana (2014), Kenya (2014), Nigeria (2013), Mozambique (2011) and Democratic Republic of  
131 Congo (DRC) (2013-2014). Our previous work informed the selection of these five countries for  
132 the present analysis (12, 32). The DHS data are nationally representative, repeated cross-  
133 sectional household surveys collected primarily in LIMCs every five years using standardised  
134 questionnaires to enable cross-country comparisons (33, 34). The DHS utilises a two-stage  
135 sample design (35-39). The first stage involves the selection of sample points or clusters from  
136 an updated master sampling frame constructed from National Population and Housing Census  
137 of the respective countries (37). The clusters are selected using systematic sampling with  
138 probability proportional to size. Household listing is then conducted in all the selected clusters  
139 to provide a sampling frame for the second stage selection of households (12, 37). The second  
140 stage selection involves the systematic sampling of the households listed in each cluster and  
141 randomly select from the list the households to be included in the survey (12, 37). The  
142 rationale for the second stage selection is to ensure adequate numbers of completed individual  
143 interviews to provide estimates for critical indicators with acceptable precision. All men and  
144 women aged 15-59 and 15-49 respectively, in the selected households (men in half of the  
145 households) are eligible to participate in the surveys if they were either usual residents of the  
146 household or visitors present in the household on the night before the study (12, 37).

147

148

149 *Study participants*

150 The study population comprised children aged 0–59 months, born to mothers aged 15–49 years  
151 living in better-off households. The DHS obtained information on the children through face-to-  
152 face interviews with their mothers. Adjustable measuring board calibrated in millimetres was  
153 used in measuring study children height. Children younger than 24 months were measured  
154 lying down (recumbent length) on the board while older children were measured standing (12).  
155 The DHS then converted the height data into Z-scores based on the 2006 WHO growth  
156 standards (40). The total samples used in the current analysis were: Ghana, n= 1,247; Nigeria,  
157 n= 12,999; Kenya, n= 3,895; Mozambique, n= 5,711; and DRC, n= 3,943.

158 **Ethics statement**

159 Before conducting the surveys, the DHS obtained ethical clearance from Government  
160 recognised Ethical Review Committees/Institutional Review Boards of the respective countries  
161 as well as the Institutional Review Board of ICF International, USA. Study children mothers or  
162 caregivers gave written informed consent before the inclusion of their children. The authors of  
163 this paper sought and obtained permission from the DHS program for the use of the data. The  
164 data were utterly anonymised, and therefore, the authors did not seek further ethical clearance  
165 before their use.

166

167

168

169 **Outcome and predictor variables**

170 *Outcome Variables*

171 The primary indicator of child linear growth used in this analysis was child height-for-age Z-  
172 scores (HAZ). The HAZ scores were computed using 2006 WHO growth standards (40) and  
173 classified into normal growth (or not stunted) and stunted (or poor growth). In this paper,  
174 children who have HAZ equal to or above -2 SD ( $HAZ \geq -2SD$ ) (40, 41) were described as having a  
175 normal growth, while children with HAZ below -2 SD ( $HAZ < -2$ ) from the median HAZ of the  
176 WHO reference population(40) were considered stunted (chronically malnourished).

177

178 *Predictor variables*

179 We classified the predictor variables into child (dietary diversity, age and sex), maternal (body  
180 mass index, education, age, work status, parity, breastfeeding status, marital status, antenatal  
181 attendance), household (sex of household head, household size, number of children under 5  
182 years) and community (place of residence) level variables. The child dietary diversity (DD) was  
183 created by counting the number of food groups the mother reported the child had consumed in  
184 the past 24h before the interview. In accordance with recommended procedures on the  
185 construction of the child DD indicator (42), we regrouped the food types in the data into seven  
186 (7) main categories (12): (i) grains, roots and tubers; (ii) legumes and nuts; (iii) dairy products;  
187 (iv) flesh foods and organ meats; (v) vitamin A-rich fruits and vegetables; (vi) eggs; and (vii)

188 other fruits and vegetables. A value of 1 was given for the child's consumption of any of the  
189 food groups within 24h, while we assigned 0 for non-consumption (12). These scores were  
190 then summed up to obtain the DD score, ranging from 0 to 7, and used in the analysis as a  
191 categorical predictor variable. Also, a score of 1 was assigned to a mother who indicated she  
192 was still breastfeeding, and 0 for "no" response. Marital status was recoded into "not in union"  
193 "cohabiting" and "married". Maternal body mass index (BMI), also referred to as Quetelet's  
194 Index (43), was derived by dividing weight in kilograms by the squared height in meters (12).  
195 The BMI ( $\text{kg}/\text{m}^2$ ) was then classified into  $\text{BMI} < 18.50 \text{ kg}/\text{m}^2$  (underweight),  $\text{BMI} = 18.50\text{-}24.99$   
196  $\text{kg}/\text{m}^2$  (normal weight),  $\text{BMI} = 25.0\text{-}29.9 \text{ kg}/\text{m}^2$  (overweight) and  $\text{BMI} \geq 30.0 \text{ kg}/\text{m}^2$  (obese) (44).  
197 We used  $\text{BMI} < 18.50 \text{ kg}/\text{m}^2$  (underweight) as a referenced category in the analysis. We selected  
198 the predictor variables based on the UNICEF conceptual framework of childcare (9) and the  
199 literature. We subjected the selected variables to bivariate analysis to establish their  
200 relationship with the outcome variable. Only statistically significant variables were included in  
201 the multivariable analysis.

#### 202 *Stratification variable*

203 We used the household wealth index (WI) as the stratification variable in the analysis. Several  
204 DHS reports used the WI to estimate inequalities in household characteristics, in the use of  
205 health and other services, and health outcomes (34, 35, 37, 45). It is an indicator of wealth that  
206 is consistent with expenditure and income measurement among households (33, 34, 37). The  
207 index was created based on assets ownership and housing characteristics of each household:  
208 type of roofing, and flooring material, source of drinking water, sanitation facilities, ownership  
209 of television, bicycle, motorcycle, automobile among others. A principal component analysis

210 was employed to assign weights to each asset in each household. The asset scores were  
211 summed up, and individuals ranked according to the household score. The DHS then divided  
212 the WI into quintiles: poorest, poorer, middle, richer and richest (33, 34, 37). For this analysis,  
213 we recoded middle, richer and richest households into “better-off households”. We restricted  
214 all the investigations to this sub-category.

215

### 216 *Framework underpinning the analysis*

217 The UNICEF conceptual framework (46), which outlines the causes of undernutrition  
218 underpinned our empirical analysis. It is a socio-ecological model encompassing factors at the  
219 individual, household and societal levels. In the UNICEF framework, child malnutrition is  
220 analysed in terms of immediate, underlying and basic causes. The immediate causes are  
221 inadequate dietary intakes and infectious disease, the underlying causes are inadequate  
222 maternal, and childcare, inadequate health services and healthy environment and the basic  
223 causes are institutional and socio-economic determinants and potential resources  
224 (46). However, the extended UNICEF conceptual framework for childcare, survival, growth and  
225 development guided the present analysis (9, 46). This framework suggests that child survival,  
226 growth and development are influenced by a web of factors, with three underlying  
227 determinants being food security, healthcare and a healthy environment, and care for children  
228 and women (9). Basic determinants have a direct influence on these underlying determinants.  
229 These basic determinants may be described as "exogenous" determinants, which influence  
230 child nutrition through their effect on the intervening proximate determinants (underlying

231 determinants). The underlying factors are, therefore, endogenously determined by the  
232 exogenous factors (46). In this analysis, we included only the basic factors (socio-demographic)  
233 in our empirical models. We did this because there is evidence that in examining the  
234 association between child growth outcomes and exogenous factors, the proximate factors are  
235 usually excluded to prevent biased and uninterpretable parameters (47-49). Besides the basic  
236 factors, we also included antenatal care (ANC) and breastfeeding practices, which relies mostly  
237 on exogenous public health provisions rather than socio-demographic endowments of the  
238 household (46). We included the two variables in the models' because changes in them are  
239 likely to be more responsive to policies, programmes and interventions rather than to  
240 differences in socio-demographic endowments of the household (46). For example, there is  
241 evidence that policy, institutional and contextual settings are critical determinants of the  
242 prevalence of breastfeeding practices (47, 50).

### 243 **Data analysis**

244 We built two empirical regression models for each of the five countries. In the first models, we  
245 included maternal BMI, education, age, work status, parity, breastfeeding status, marital status,  
246 antenatal attendance, sex of household head, household size, number of children under five  
247 years and place of residence. We adjusted for child DD, age and sex in the second and final  
248 model. We estimated adjusted odds ratios (aORs) of the associations between the  
249 sociodemographic factors and normal growth among children in better-off households. Because  
250 the DHS utilised complex sample design, we accounted for design effect in all the analysis using  
251 parameters such as primary sampling unit, strata and weight.

## 252 **Results**

### 253 *Characteristics of study samples*

254 The results showed that Ghana (87%) had the highest number of children with normal growth  
255 followed by Kenya (80%), while in Mozambique, DRC and Nigeria, the prevalence ranged from  
256 62% to 74%. Regarding dietary diversity intake, Mozambique had the highest prevalence of  
257 children who consumed at least four food groups (21%), with DRC (12%) having the lowest  
258 prevalence. Similarly, Mozambique had the highest number of women with normal weight  
259 (73%), followed by DRC (69%). The prevalence ranged from 43% to 59% in Ghana, Kenya and  
260 Nigeria. Ghana had the highest prevalence (59%) of women who had attained a secondary  
261 school education, while Mozambique had the lowest prevalence (21%). Higher education was  
262 less than 15% among women across all countries, with Mozambique (1.3%) registering the  
263 lowest prevalence. DRC had the highest prevalence (86%) of ANC attendance among women  
264 followed by Ghana (72%), while Nigeria had the lowest prevalence (19%). Also, Mozambique  
265 (35%) had the highest number of women who were household heads, with Nigeria (14%) having  
266 the lowest women-headed households (Table 1).

267 **Table 1: Characteristics of the study samples of the five countries**

| Variables                         | DRC    |      | Ghana  |      | Kenya  |      | Mozambique |      | Nigeria |      |
|-----------------------------------|--------|------|--------|------|--------|------|------------|------|---------|------|
|                                   | %/mean | SD   | %/mean | SD   | %/mean | SD   | %/mean     | SD   | %/mean  | SD   |
| <b>Child-level covariates</b>     |        |      |        |      |        |      |            |      |         |      |
| Height-for-age (HAZ $\geq$ -2)    | 62.0   |      | 87.0   |      | 80.0   |      | 66.0       |      | 74.2    |      |
| DD < 4 food groups                | 87.6   |      | 87.0   |      | 80.2   |      | 78.6       |      | 86.9    |      |
| DD $\geq$ 4 food groups           | 12.4   |      | 14.0   |      | 19.8   |      | 21.4       |      | 13.1    |      |
| <b>Sex of child</b>               |        |      |        |      |        |      |            |      |         |      |
| Female                            | 50.4   |      | 48.0   |      | 49     |      | 49.2       |      | 49.5    |      |
| Male                              | 49.6   |      | 52.0   |      | 51.0   |      | 50.8       |      | 50.5    |      |
| <b>Mother-level covariates</b>    |        |      |        |      |        |      |            |      |         |      |
| <b>Body Mass Index (BMI)</b>      |        |      |        |      |        |      |            |      |         |      |
| BMI <18.50                        | 9.4    |      | 2.9    |      | 5.34   |      | 4.11       |      | 5.42    |      |
| BMI = 18.50-24.99                 | 69.2   |      | 43.0   |      | 55.1   |      | 73.9       |      | 58.7    |      |
| BMI = 25-29.99                    | 16.3   |      | 32.0   |      | 27.0   |      | 17.2       |      | 24.6    |      |
| BMI $\geq$ 30                     | 3.9    |      | 22.0   |      | 12.6   |      | 4.54       |      | 10.9    |      |
| <b>Education</b>                  |        |      |        |      |        |      |            |      |         |      |
| No education                      | 12.6   |      | 15.0   |      | 6.0    |      | 24.5       |      | 20.6    |      |
| Primary education                 | 38.7   |      | 18.0   |      | 50.8   |      | 53.4       |      | 24.3    |      |
| Secondary education               | 46.8   |      | 59.0   |      | 30.5   |      | 20.8       |      | 43.6    |      |
| Higher education                  | 1.8    |      | 7.5    |      | 12.6   |      | 1.26       |      | 11.5    |      |
| <b>Working status</b>             |        |      |        |      |        |      |            |      |         |      |
| Not working                       | 27.2   |      | 25.0   |      | 36.4   |      | 63.3       |      | 25.3    |      |
| IS working                        | 72.5   |      | 74.0   |      | 63.4   |      | 36.7       |      | 74.3    |      |
| Parity                            | 4.37   | 2.58 | 2.99   | 1.69 | 3.127  | 2.05 | 3.51       | 2.12 | 3.90    | 2.32 |
| Is Breastfeeding                  | 67.8   |      | 53.0   |      | 51.3   |      | 55.8       |      | 51.5    |      |
| <b>Marital status</b>             |        |      |        |      |        |      |            |      |         |      |
| Not in union                      | 13.3   |      | 13.0   |      | 14.7   |      | 17.3       |      | 5.1     |      |
| Married                           | 67.1   |      | 65.0   |      | 79.6   |      | 45.0       |      | 90.5    |      |
| Cohabiting                        | 19.7   |      | 22.0   |      | 5.62   |      | 37.6       |      | 4.4     |      |
| <b>Antenatal attendance (ANC)</b> |        |      |        |      |        |      |            |      |         |      |

|     |                                   |      |                |      |          |      |      |        |      |             |           |
|-----|-----------------------------------|------|----------------|------|----------|------|------|--------|------|-------------|-----------|
|     | Number of ANC visits >=4          | 86.3 |                | 72.0 |          | 50.8 |      | 45.1   |      | 48.2        |           |
|     | <b>Household-level covariates</b> |      |                |      |          |      |      |        |      |             |           |
|     | <b>Sex of household head</b>      |      |                |      |          |      |      |        |      |             |           |
|     | Household head is Female          | 19.7 |                | 29.0 |          | 29.6 |      | 34.5   |      | 13.9        |           |
|     | Household head is Male            | 80.3 |                | 71.0 |          | 70.4 |      | 65.5   |      | 86.1        |           |
|     | Household size                    | 7.30 | 2.99           | 5.0  | 1.93     | 5.57 | 2.31 | 6.49   | 2.89 | 6.73        | 3.56      |
|     | Number of children under 5        | 2.28 |                | 1.6  | 0.69     | 1.64 | 0.76 | 1.92   | 0.94 | 2.14        | 1.11      |
|     | <b>Community-level covariates</b> |      |                |      |          |      |      |        |      |             |           |
|     | Urban residence                   | 49.2 |                | 73.0 |          | 52.3 |      | 45.2   |      | 55.1        |           |
| 268 | DD=Dietary diversity;             |      | DRC=Democratic |      | Republic |      | of   | Congo; |      | SD=Standard | deviation |

269 *Multivariable results of the factors promoting or inhibiting normal child growth*

270 The results of the multivariable analysis of the associations between maternal, child, household  
271 and community-level factors, and normal growth among children under five years in better-off  
272 households are presented in Tables 2-6.

273 *Factors associated positively with normal child growth*

274 The results showed that normal maternal weight (measured by BMI) was associated with  
275 increased odds of normal linear growth among children in Mozambique (aOR=1.82, 95%  
276 CI=1.33, 2.50). Similarly, overweight associated with increased odds of normal linear growth in  
277 DRC (aOR=1.75, 95% CI=1.17,2.62), Kenya (aOR=2.01, 95% CI= 1.28, 3.16), Mozambique  
278 (aOR=2.19, 95%= 1.53, 3.14) and Nigeria (aOR=1.44, 95%=1.16,1.77) relative to children of  
279 underweight mothers. Maternal obesity had a similar effect on normal linear growth in Kenya,  
280 Mozambique and Nigeria. One year increase in maternal years of education was associated  
281 with increased odds in normal linear growth among children in DRC (aOR=1.06, 95% CI=1.03,  
282 1.09), Ghana (aOR=1.08, 95% CI=1.04, 1.12), Mozambique (aOR=1.08, 95% CI=1.05, 1.11) and  
283 Nigeria (aOR=1.07, 95% CI=1.06, 1.08). The results in Kenya did not reach statistical significance.  
284 An additional year in maternal age was associated with increased odds of normal linear growth  
285 among children in all the countries included in the analysis. Breastfeeding was associated with  
286 increased odds of normal linear growth in Nigeria (aOR= 1.30, 95% CI=1.16, 1.46) and Kenya  
287 (aOR=1.37, 95% CI=1.05, 1.79). In Ghana, Mozambique and DRC, breastfeeding was associated  
288 positively with normal linear growth in the first model. Still, this statistical significant  
289 association disappeared after the child level covariates such as age, sex and dietary diversity

290 were included in the final empirical model. Urban place of residence was associated with  
291 increased odds of normal linear growth among children in DRC (aOR=1.32, 95% CI=1.06, 1.65)  
292 and Mozambique (aOR=1.18, 95% CI=1.01, 1.38). The association did not reach statistical  
293 significance in the remaining three countries.

294

### 295 *Factors associated negatively with normal child growth*

296 This section examines the factors associated negatively with normal linear growth. The results  
297 showed that children of mothers who were working had 25% (aOR=0.75, 95% CI=0.60, 0.93)  
298 reduced odds of normal linear growth in DRC. A unit change in maternal parity was associated  
299 with 10% (aOR=0.90, 95% CI=0.84, 0.97), 23% (aOR=0.77, 95% CI=0.63, 0.93), 25% (aOR=0.75,  
300 95% CI=0.69, 0.82), 6% (aOR=0.94, 95% CI=0.89, 0.99) and 5% (aOR=0.95, 95% CI=0.92, 0.99)  
301 reduced odds of normal linear growth among children in DRC, Ghana, Kenya, Mozambique and  
302 Nigeria respectively. Similarly, a unit change in child's age was associated with reduced odds of  
303 normal linear growth in DRC, Mozambique and Nigeria. Further, a child being a male was  
304 associated with 16% (aOR=0.82, 95% CI=0.68, 0.98), 40% (aOR=0.60, 95% CI=0.40, 0.89), 37%  
305 (aOR=0.63, 95% CI=0.51, 0.77) and 21% (aOR=0.79, 95% CI=0.71, 0.87) reduced odds of normal  
306 linear growth among children in DRC, Ghana, Kenya and Nigeria respectively. The association in  
307 Mozambique did not reach statistical significance.

308

309

310

311 **Table 2: Adjusted odd ratios (aOR) of factors associated with normal growth among children living in**  
 312 **better-off households, DRC**

| Variables                                | Model 1                     | Model 2                     |
|------------------------------------------|-----------------------------|-----------------------------|
| <b>Mother-level covariates</b>           |                             |                             |
| BMI (kg/m <sup>2</sup> ) = 18.50 - 24.99 | 1.093<br>(0.782 - 1.526)    | 1.124<br>(0.796 - 1.589)    |
| BMI (kg/m <sup>2</sup> ) = 25 - 29.99    | 1.685***<br>(1.138 - 2.493) | 1.751***<br>(1.172 - 2.617) |
| BMI (kg/m <sup>2</sup> ) >= 30           | 1.573<br>(0.855 - 2.892)    | 1.729<br>(0.884 - 3.382)    |
| Maternal education (in single years)     | 1.061***<br>(1.032 - 1.090) | 1.060***<br>(1.030 - 1.091) |
| Age of the mother (in years)             | 1.039***<br>(1.015 - 1.063) | 1.051***<br>(1.026 - 1.077) |
| Working status = Is working              | 0.741***<br>(0.597 - 0.920) | 0.747**<br>(0.597 - 0.934)  |
| Parity                                   | 0.902***<br>(0.844 - 0.965) | 0.899***<br>(0.838 - 0.965) |
| Is Breastfeeding = Yes                   | 1.678***<br>(1.370 - 2.055) | 1.184<br>(0.943 - 1.487)    |
| Marital Status = Married                 | 1.034<br>(0.756 - 1.415)    | 1.076<br>(0.786 - 1.473)    |
| Marital Status = Cohabiting              | 0.976<br>(0.687 - 1.389)    | 0.994<br>(0.697 - 1.418)    |
| Number of antenatal visits = 4+ visits   | 1.589***<br>(1.296 - 1.947) | 1.159<br>(0.923 - 1.457)    |
| <b>Household-level covariates</b>        |                             |                             |
| Head of HH is Male                       | 0.865<br>(0.681 - 1.098)    | 0.868<br>(0.678 - 1.111)    |
| Household size                           | 1.007<br>(0.968 - 1.048)    | 1.002<br>(0.962 - 1.043)    |
| Number of children under 5 years         | 0.945<br>(0.844 - 1.059)    | 0.954<br>(0.850 - 1.071)    |
| <b>Community-level covariates</b>        |                             |                             |
| Urban residence = Urban                  | 1.322**<br>(1.066 - 1.640)  | 1.320**<br>(1.059 - 1.646)  |
| <b>Child-level covariates</b>            |                             |                             |
| Dietary Diversity (DD) >= 4              |                             | 1.294*<br>(0.971 - 1.724)   |
| Age of the child (in months)             |                             | 0.975***<br>(0.969 - 0.982) |
| Sex of child = Male                      |                             | 0.815**<br>(0.677 - 0.982)  |
| <b>Observations</b>                      | <b>3,943</b>                | <b>3,943</b>                |

95% Confidence Intervals (CIs) in parentheses; DD-Dietary diversity; HH-Household; BMI-Body mass index  
 \*\*\* p<0.01, \*\* p<0.05, \* p<0.1

313

314

315 **Table 3: Adjusted odd ratios (aOR) of factors associated with normal growth among children living in**  
 316 **better-off households, Ghana**

| Variables                                | Model 1                     | Model 2                     |
|------------------------------------------|-----------------------------|-----------------------------|
| <b>Mother-level covariates</b>           |                             |                             |
| BMI (kg/m <sup>2</sup> ) = 18.50 - 24.99 | 0.692<br>(0.224 - 2.136)    | 0.725<br>(0.241 - 2.181)    |
| BMI (kg/ m <sup>2</sup> ) = 25 - 29.99   | 1.230<br>(0.385 - 3.929)    | 1.270<br>(0.410 - 3.931)    |
| BMI (kg/ m <sup>2</sup> ) >= 30          | 1.617<br>(0.478 - 5.469)    | 1.700<br>(0.514 - 5.628)    |
| Maternal education (in single years)     | 1.078***<br>(1.037 - 1.121) | 1.081***<br>(1.039 - 1.124) |
| Age of the mother (in years)             | 1.047*<br>(0.998 - 1.099)   | 1.052**<br>(1.001 - 1.105)  |
| Working status = Is working              | 1.276<br>(0.821 - 1.983)    | 1.264<br>(0.804 - 1.987)    |
| Parity                                   | 0.779**<br>(0.643 - 0.944)  | 0.766***<br>(0.630 - 0.932) |
| Is Breastfeeding = Yes                   | 1.769**<br>(1.129 - 2.771)  | 1.748*<br>(0.981 - 3.116)   |
| Marital Status = Married                 | 1.956**<br>(1.032 - 3.708)  | 2.104**<br>(1.101 - 4.022)  |
| Marital Status = Cohabiting              | 1.524<br>(0.783 - 2.967)    | 1.659<br>(0.849 - 3.240)    |
| Number of antenatal visits = 4+ visits   | 1.124<br>(0.695 - 1.817)    | 1.110<br>(0.646 - 1.906)    |
| <b>Household-level covariates</b>        |                             |                             |
| Head of HH is Male                       | 1.250<br>(0.783 - 1.996)    | 1.200<br>(0.753 - 1.911)    |
| Household size                           | 0.998<br>(0.894 - 1.114)    | 0.998<br>(0.891 - 1.117)    |
| Number of children under 5               | 0.834<br>(0.555 - 1.253)    | 0.843<br>(0.559 - 1.274)    |
| <b>Community-level covariate</b>         |                             |                             |
| Urban residence = Urban                  | 1.020<br>(0.640 - 1.628)    | 0.988<br>(0.623 - 1.565)    |
| <b>Child-level covariates</b>            |                             |                             |
| Dietary Diversity (DD) >= 4              |                             | 1.022<br>(0.590 - 1.770)    |
| Age of the child (in months)             |                             | 0.998<br>(0.982 - 1.014)    |
| Sex of child = Male                      |                             | 0.596**<br>(0.400 - 0.887)  |
| <b>Observations</b>                      | <b>1,247</b>                | <b>1,247</b>                |

95% Confidence Intervals (CIs) in parentheses; DD-Dietary diversity; HH-Household; BMI-Body mass index  
 \*\*\* p<0.01, \*\* p<0.05, \* p<0.1

**Table 4: : Adjusted odd ratios (aOR) of factors associated with normal growth among children living in better-off households, Kenya**

| Variables                                 | Model 1                     | Model 2                     |
|-------------------------------------------|-----------------------------|-----------------------------|
| <b>Mother-level covariates</b>            |                             |                             |
| BMI (kg/ m <sup>2</sup> ) = 18.50 - 24.99 | 1.245<br>(0.824 - 1.881)    | 1.313<br>(0.872 - 1.976)    |
| BMI (kg/ m <sup>2</sup> ) = 25 - 29.99    | 1.880***<br>(1.195 - 2.960) | 2.014***<br>(1.284 - 3.158) |
| BMI (kg/ m <sup>2</sup> ) >= 30           | 1.860**<br>(1.082 - 3.195)  | 1.991**<br>(1.165 - 3.402)  |
| Maternal education (in single years)      | 1.017<br>(0.984 - 1.051)    | 1.021<br>(0.987 - 1.055)    |
| Age of the mother (in years)              | 1.074***<br>(1.046 - 1.102) | 1.075***<br>(1.046 - 1.104) |
| Working status = Is working               | 0.969<br>(0.775 - 1.211)    | 0.982<br>(0.786 - 1.227)    |
| Parity                                    | 0.752***<br>(0.688 - 0.823) | 0.752***<br>(0.687 - 0.822) |
| Is Breastfeeding = Yes                    | 1.373***<br>(1.103 - 1.710) | 1.367**<br>(1.047 - 1.785)  |
| Marital Status = Married                  | 1.131<br>(0.826 - 1.547)    | 1.112<br>(0.810 - 1.526)    |
| Marital Status = Cohabiting               | 1.278<br>(0.785 - 2.079)    | 1.233<br>(0.756 - 2.009)    |
| Number of antenatal visits = 4+ visits    | 1.132<br>(0.906 - 1.415)    | 1.095<br>(0.862 - 1.390)    |
| <b>Household-level covariates</b>         |                             |                             |
| Head of HH is Male                        | 0.986<br>(0.781 - 1.245)    | 0.987<br>(0.780 - 1.248)    |
| Household size                            | 1.054*<br>(0.991 - 1.122)   | 1.047<br>(0.984 - 1.114)    |
| Number of children under 5                | 1.018<br>(0.871 - 1.189)    | 1.026<br>(0.878 - 1.200)    |
| <b>Community-level covariate</b>          |                             |                             |
| Urban residence = Urban                   | 0.883<br>(0.719 - 1.085)    | 0.890<br>(0.723 - 1.096)    |
| <b>Child-level covariates</b>             |                             |                             |
| Dietary Diversity (DD) >= 4               |                             | 0.784*<br>(0.597 - 1.030)   |
| Age of the child (in months)              |                             | 0.996<br>(0.989 - 1.003)    |
| Sex of child = Male                       |                             | 0.625***<br>(0.507 - 0.770) |
| <b>Observations</b>                       | <b>3,985</b>                | <b>3,985</b>                |

95% Confidence Intervals (CIs) in parentheses; DD-Dietary diversity; HH-Household; BMI-Body mass index  
 \*\*\* p<0.01, \*\* p<0.05, \* p<0.1

318 **Table 5: : Adjusted odd ratios (aOR) of factors associated with normal growth among children living in**  
 319 **better-off households, Mozambique**

| Variables                                  | Model 1                     | Model 2                     |
|--------------------------------------------|-----------------------------|-----------------------------|
| <b>Mother-level covariates</b>             |                             |                             |
| BMI (kg/ m <sup>2</sup> ) = 18.50 - 24.99  | 1.780***<br>(1.303 - 2.430) | 1.823***<br>(1.329 - 2.500) |
| BMI (kg/m m <sup>2</sup> ) = 25.00 - 29.99 | 2.144***<br>(1.502 - 3.060) | 2.190***<br>(1.528 - 3.137) |
| BMI (kg/ m <sup>2</sup> ) >= 30            | 4.106***<br>(2.453 - 6.870) | 4.268***<br>(2.537 - 7.179) |
| Maternal education (in single years)       | 1.077***<br>(1.052 - 1.102) | 1.079***<br>(1.054 - 1.105) |
| Age of the mother (in years)               | 1.035***<br>(1.018 - 1.052) | 1.039***<br>(1.022 - 1.056) |
| Working status = Is working                | 0.941<br>(0.813 - 1.088)    | 0.950<br>(0.821 - 1.098)    |
| Parity                                     | 0.943**<br>(0.894 - 0.995)  | 0.942**<br>(0.892 - 0.994)  |
| Is Breastfeeding = Yes                     | 1.240***<br>(1.068 - 1.439) | 1.070<br>(0.906 - 1.263)    |
| Marital Status = Married                   | 0.977<br>(0.787 - 1.213)    | 1.009<br>(0.811 - 1.255)    |
| Marital Status = Cohabiting                | 1.278**<br>(1.035 - 1.578)  | 1.289**<br>(1.043 - 1.593)  |
| Number of antenatal visits = 4+ visits     | 1.055<br>(0.911 - 1.222)    | 0.942<br>(0.807 - 1.100)    |
| <b>Household-level covariates</b>          |                             |                             |
| Head of HH is Male                         | 0.874*<br>(0.746 - 1.024)   | 0.887<br>(0.757 - 1.039)    |
| Household size                             | 1.018<br>(0.988 - 1.048)    | 1.016<br>(0.986 - 1.046)    |
| Number of children under 5                 | 0.998<br>(0.908 - 1.098)    | 1.009<br>(0.916 - 1.111)    |
| <b>Community-level covariate</b>           |                             |                             |
| Urban residence = Urban                    | 1.185**<br>(1.014 - 1.385)  | 1.181**<br>(1.010 - 1.381)  |
| <b>Child-level covariates</b>              |                             |                             |
| Dietary Diversity (DD) >= 4                |                             | 0.888<br>(0.752 - 1.048)    |
| Age of the child (in months)               |                             | 0.991***<br>(0.986 - 0.995) |
| Sex of child = Male                        |                             | 0.931<br>(0.811 - 1.069)    |
| <b>Observations</b>                        | <b>5,711</b>                | <b>5,711</b>                |

95% Confidence Intervals (CIs) in parentheses; DD-Dietary diversity; HH-Household; BMI-Body mass index  
 \*\*\* p<0.01, \*\* p<0.05, \* p<0.1

321 **Table 6: : Adjusted odd ratios (aOR) of factors associated with normal growth among children living in**  
 322 **better-off households, Nigeria**

| Variables                                 | Model 1                     | Model 2                     |
|-------------------------------------------|-----------------------------|-----------------------------|
| <b>Mother-level covariates</b>            |                             |                             |
| BMI (kg/ m <sup>2</sup> ) = 18.50 - 24.99 | 1.135<br>(0.934 - 1.379)    | 1.129<br>(0.931 - 1.371)    |
| BMI (kg/ m <sup>2</sup> ) = 25.00 - 29.99 | 1.434***<br>(1.157 - 1.777) | 1.435***<br>(1.159 - 1.777) |
| BMI (kg/ m <sup>2</sup> ) >= 30           | 1.697***<br>(1.309 - 2.200) | 1.706***<br>(1.316 - 2.211) |
| Maternal education (in single years)      | 1.067***<br>(1.056 - 1.079) | 1.068***<br>(1.057 - 1.080) |
| Age of the mother (in years)              | 1.033***<br>(1.021 - 1.045) | 1.039***<br>(1.027 - 1.051) |
| Working status = Is working               | 1.072<br>(0.958 - 1.199)    | 1.106*<br>(0.988 - 1.238)   |
| Parity                                    | 0.957***<br>(0.925 - 0.989) | 0.954***<br>(0.922 - 0.986) |
| Is Breastfeeding = Yes                    | 1.537***<br>(1.388 - 1.703) | 1.303***<br>(1.162 - 1.461) |
| Marital Status = Married                  | 0.806*<br>(0.625 - 1.039)   | 0.803*<br>(0.622 - 1.037)   |
| Marital Status = Cohabiting               | 0.866<br>(0.606 - 1.237)    | 0.846<br>(0.592 - 1.209)    |
| Number of antenatal visits = 4+ visits    | 1.080<br>(0.975 - 1.197)    | 0.877**<br>(0.776 - 0.990)  |
| <b>Household-level covariates</b>         |                             |                             |
| Head of HH is Male                        | 0.850**<br>(0.728 - 0.992)  | 0.856*<br>(0.733 - 1.000)   |
| Household size                            | 0.980**<br>(0.963 - 0.998)  | 0.980**<br>(0.962 - 0.998)  |
| Number of children under 5                | 0.946*<br>(0.893 - 1.002)   | 0.941**<br>(0.888 - 0.997)  |
| <b>Community-level covariate</b>          |                             |                             |
| Urban residence = Urban                   | 1.004<br>(0.910 - 1.108)    | 1.013<br>(0.917 - 1.118)    |
| <b>Child-level covariates</b>             |                             |                             |
| Dietary Diversity (DD) >= 4               |                             | 1.055<br>(0.904 - 1.231)    |
| Age of the child (in months)              |                             | 0.988***<br>(0.984 - 0.991) |
| Sex of child = Male                       |                             | 0.785***<br>(0.712 - 0.865) |
| <b>Observations</b>                       | <b>12,999</b>               | <b>12,999</b>               |

95% Confidence Intervals (CIs) in parentheses; DD-Dietary diversity; HH-Household; BMI-Body mass index  
 \*\*\* p<0.01, \*\* p<0.05, \* p<0.1

323

324

## 325 **Discussion**

326 This study investigated the maternal, child, household and community factors associated with  
327 normal linear growth among children living in better-off households in DRC, Ghana, Kenya,  
328 Mozambique and Nigeria. The results highlight the critical factors related to child growth  
329 outcomes and country-specific variations of these effects in the five countries. In the current  
330 analysis, higher maternal weight (measured by BMI) tends to have a significant positive impact  
331 on normal growth among children living in better-off households in all countries except Ghana.  
332 Thus, maternal weight is a crucial determinant of positive child growth outcomes. Even though  
333 a higher maternal weight has a positive effect on child normal growth, interventions should  
334 target increasing maternal weight qualitatively for the benefit of both the mother and child. It is  
335 critical because of the negative effect of unhealthy weight on maternal health outcomes (51-  
336 53). These findings are in line with the literature. Maternal nutrition was found to have a  
337 significant positive effect on child linear growth in many settings (10-12). In India, BMI, among  
338 other variables, was found to have a substantial impact on child linear growth (11). The  
339 preceding discussion illuminated the crucial role maternal nutrition plays in improving child  
340 nutritional status, although the pathways through which this happens may be complicated.

341

342 The vital role maternal education plays in promoting positive child health outcomes was  
343 observed in the present study. Our results showed that maternal years of schooling have  
344 significant positive effects on normal linear growth in all the five countries except Kenya. Thus,  
345 suggesting that maternal education has the potential to promote the normal growth of children

346 living in better-off households. Interventions to improve child growth may have a positive  
347 impact on children living in these households. Previous studies documented the beneficial  
348 effects of maternal years of education on child growth outcomes. Improvement in maternal  
349 education was associated positively with a dramatic change in linear growth among pre-school  
350 children (10-12). It may be the case because educated mothers tend to utilise both preventive  
351 and curative health care more (54, 55). Educated mothers also tend to have more strongly  
352 committed attitude towards good childcare than uneducated mothers (56, 57). Furthermore,  
353 the more education the mother has, the more the likelihood that she is sensitive and  
354 responsive to caregiving duties (56, 57). Also, there is evidence that children seemingly engage  
355 more positively with their mothers when maternal education is higher (12, 57). All the above  
356 have positive effects on child growth outcomes. The literature discussed above, together with  
357 our study, demonstrated the importance of maternal education for positive child health  
358 outcomes.

359

360 The benefits of breastfeeding to child health were illuminated in this study but only in two  
361 countries. Breastfeeding practice was found to associate with the likelihood of normal linear  
362 growth among children living in better-off households in Kenya and Nigeria. The finding may  
363 imply that mothers in these households should be encouraged to practice breastfeeding  
364 because of its beneficial effects on their children growth. These findings confirm the widely  
365 recognised benefits of breastfeeding for improved health and developmental outcomes (25-  
366 27). On the contrary, breastfeeding showed a significant positive effect on child normal linear  
367 growth in the models containing only the socio-demographic factors in Ghana, Mozambique

368 and DRC. The statistically significant association disappeared after the inclusion of child-level  
369 covariates such as dietary diversity, age and sex in the final empirical models. Hence, whether  
370 breastfeeding will have a positive effect on normal child growth in better-off households or not  
371 is conditional on the inclusion or otherwise of child-level covariates. This finding corroborates  
372 previous research, which suggests the addition of child-level factors when evaluating the  
373 association of breastfeeding with anthropometric outcomes (57). The non-significant positive  
374 effect of breastfeeding on child growth has previously been documented(58-60). Thus, while  
375 breastfeeding is critical for positive child health outcomes, it is not always the case that its  
376 effects would be statistically significant.

377

378 Our analysis also illuminated negative determinants of normal linear growth. Maternal work  
379 status is inversely related to normal child growth in DRC. It implies that DRC mothers who are  
380 engaged in any form of work tend to have children who have poor linear growth relative to  
381 mothers who are not working. The negative effect may boil down to inadequate childcare due  
382 to limited time available to working mothers. A study in India concluded that a mother's  
383 employment compromises infant feeding and care, particularly so when mothers are not able  
384 to get alternative caregivers (61). This study further reported that the compromises related to  
385 childcare and feeding outweigh the benefits from employment (61). Other studies have shown  
386 that mothers working away from home spend less time with their children compared to  
387 mothers who are not working outside the home and therefore likely to have children who are  
388 undernourished (62, 63). Although women who are working tend to have access to disposable  
389 income and consequently able to provide nutritious food for their children (13, 17, 64, 65), the

390 above discussion showed that maternal employment, indeed, could negatively affect child  
391 growth outcomes. It is worthy to note that this analysis did not investigate the categories of  
392 work and their effect on child growth (12). We are therefore unable to tell the independent  
393 impact of the various occupational groups on child linear growth. It is a limitation worth noting,  
394 as different occupations may have different effects.

395

396 Similarly, maternal parity was negatively associated with normal child growth. The results show  
397 that higher maternal parity impact negatively on normal linear growth in better-off households.  
398 The effect is most significant in Kenya (25%) followed by Ghana (23%), with the least impact  
399 being in Nigeria (5%). The findings suggest that higher parity has a stronger negative effect on  
400 child normal growth in Kenya and Ghana relative to the other countries. The adverse effects of  
401 parity on child growth may be attributed to it being an essential factor that affects maternal  
402 depletion, particularly among high fertility mothers (66, 67). Poor maternal health has the  
403 potential to compromise the mothers' ability to provide proper care for their children. The  
404 consequential effect of the lack of adequate care is poor child growth. Secondly, women with  
405 higher parity are likely to have many young children, who might compete for the available care  
406 resources, which can affect good care practices and consequently their children growth  
407 outcomes. Previous studies have documented that the higher the maternal parity, the less likely  
408 that their children will have positive growth outcomes (21, 22). Children of multiparous  
409 mothers tend to have lower rates of growth and lower levels of childhood body mass index  
410 than children of nulliparous mothers (22). The preceding discussion demonstrated that parity  
411 has a significant negative effect on child linear growth.

412 Similarly, child biological factors such as sex and age were found to negatively associate with  
413 normal linear growth. A year increase in child's age was associated negatively with normal  
414 linear growth in three (DRC, Mozambique and Nigeria) of the five countries. The implication is  
415 that older children living in better-off households have a less likelihood of achieving a normal  
416 linear growth. These findings are consistent with previous research. Nshimiyiryo and colleagues  
417 (68) observed that an increase in the child's age had a significant association with poor linear  
418 growth. For instance, children aged 6–23 months were at lower risk of poor growth than those  
419 in the older age group 24–59 months (68). Also, being a male child is associated with less  
420 likelihood of normal growth among children living in better-off households. Previous work has  
421 shown that poor linear growth was higher among male children as compared to female children  
422 (69). Suggesting that male children tend to be more vulnerable to poor growth than their  
423 female counterparts in the same age group (70). It might be due to preferences in feeding  
424 practices or other types of exposures (70). The findings could also be explained by the fact that  
425 boys are expected to grow at a slightly more rapid rate compared to girls and their growth is  
426 perhaps more easily affected by nutritional deficiencies or other exposures (71).

427

#### 428 **Strengths and limitations of the study**

429 One significant advantage is the use of high quality, extensive nationally representative DHS  
430 data to investigate the factors associated with normal linear growth among children living in  
431 better-off households. The comprehensive data make it possible for the findings to be  
432 generalised to the population of young children in the respective countries. The large data also

433 help to produce more robust estimates of observed associations. The use of multi-country data  
434 unmask differences and highlights commonalities in the effects of the correlates on child  
435 growth across countries. Revealing these differences may not have been possible with single  
436 country data.

437  
438 Further, the height data used for computing the HAZ indicator were objectively measured,  
439 reducing possible misclassification. The novelty of this study is its focus on positive child growth  
440 outcomes rather than child growth deficiencies. A limitation worth mentioning is the cross-  
441 sectional nature of the data, which makes it challenging to disentangle potential reciprocal and  
442 otherwise complex causal relationships. We, therefore, restrict the interpretation of findings to  
443 mere associations between the explanatory variables and the outcome variables.

444

## 445 **Conclusions**

446 Maternal weight (BMI) tends to have significant positive effects on normal linear growth among  
447 children living in better-off households across all countries except Ghana. Interventions aimed  
448 at increasing maternal weight qualitatively are likely to be effective in improving the linear  
449 growth of children living in better-off households. Maternal years of education have significant  
450 positive effects on normal linear growth in all the five countries except Kenya. Schooling has the  
451 potential to improve normal linear growth among children in better-off households.  
452 Breastfeeding was associated with the likelihood of normal linear growth in Kenya and Nigeria.  
453 Implying that mothers in better-off households should be encouraged to practice breastfeeding

454 because of its beneficial effect on their children growth. Maternal work status is inversely  
455 related to normal growth in DRC. Thus, in DRC, mothers who are engaged in any form of work  
456 tend to have children with poor growth relative to mothers who are not working. The results  
457 show that higher maternal parity associates negatively with normal linear growth. The effect is  
458 most significant in Kenya (25%) followed by Ghana (23%), with the least impact being in Nigeria  
459 (5%). Thus, higher parity has a stronger negative impact on child normal linear growth in Kenya  
460 and Ghana relative to the other countries.

461

#### 462 **Acknowledgements**

463 We wish to express our gratitude to The DHS Program, USA for providing us access to the data.  
464 We also wish to acknowledge institutions of respective countries that played critical roles in the  
465 data collection process.

466

#### 467 **Competing Interest**

468 The authors have no competing interests to declare.

#### 469 **Funding**

470 This study did not receive funding from any source.

#### 471 **Data Sharing Statement**

472 This study was a re-analysis of existing data that are publicly available from The DHS Program  
473 at <http://dhsprogram.com/publications/publication-fr221-dhs-final-reports.cfm>. Data are  
474 accessible free of charge upon registration with the Demographic and Health Survey program  
475 (The DHS Program). The registration is done on the DHS website indicated above.

#### 476 **Authors' Contribution**

477 DAA conceived and designed the study, interpreted the results, wrote the first draft of the  
478 manuscript, and contributed to the revision of the manuscript. DAA and ZTD analysed the data.  
479 ZTD and EWK contributed to study design, data interpretation, and critical revision of the  
480 manuscript. All authors take responsibility for any issues that might arise from the publication  
481 of this manuscript.

482

483

484

485

486

487

488

489

490

491

492

## 493 **References**

494

- 495 1. Kowalski AJ, Georgiadis A, Behrman JR, Crookston BT, Fernald LCH, Stein AD. Linear Growth  
496 through 12 Years is Weakly but Consistently Associated with Language and Math Achievement Scores at  
497 Age 12 Years in 4 Low- or Middle-Income Countries. *The Journal of nutrition*. 2018;148(11):1852-9.
- 498 2. Sudfeld CR, McCoy DC, Danaei G, Fink G, Ezzati M, Andrews KG, et al. Linear growth and child  
499 development in low- and middle-income countries: a meta-analysis. *Pediatrics*. 2015;135(5):e1266-75.
- 500 3. Prendergast AJ, Humphrey JH. The stunting syndrome in developing countries. *Paediatrics and*  
501 *International Child Health*. 2014;34(4):250-65.
- 502 4. WHO. Accelerating nutrition improvements in Sub-Saharan Africa: scaling up nutrition  
503 interventions: Final report 2012-2016. Geneva; 2017.
- 504 5. Lartey A. Maternal and child nutrition in Sub-Saharan Africa: challenges and interventions. *The*  
505 *Proceedings of the Nutrition Society*. 2008;67(1):105-8.
- 506 6. Hossain M, Choudhury N, Adib Binte Abdullah K, Mondal P, Jackson AA, Walson J, et al.  
507 Evidence-based approaches to childhood stunting in low and middle income countries: a systematic  
508 review. *Archives of Disease in Childhood*. 2017;102(10):903.
- 509 7. Akombi BJ, Agho KE, Merom D, Renzaho AM, Hall JJ. Child malnutrition in sub-Saharan Africa: A  
510 meta-analysis of demographic and health surveys (2006-2016). *PloS one*. 2017;12(5):e0177338-e.
- 511 8. Engle P. The role of caring practices and resources for care in child survival, growth, and  
512 developments: South and Southeast Asia *Asian Development Review*. 1999;17(1,2):132-67.
- 513 9. Engle PL, Menon P, Haddadb L. Care and nutrition: concepts and measurements. Washington,  
514 DC: UNICEF/International Food Policy Institute. 1997.
- 515 10. Uttamacharya U, Arokiasamy P, Verma R. Determinants of child Anthropometrics in India: A  
516 quantile regression analysis 2013 [Available from:  
517 <http://iussp.org/en/event/17/programme/paper/3785>.
- 518 11. Fenske N, Burns J, Hothorn T, Rehfuess EA. Understanding Child Stunting in India: A  
519 Comprehensive Analysis of Socio-Economic, Nutritional and Environmental Determinants Using Additive  
520 Quantile Regression *PloS one*. 2013;8(11).
- 521 12. Amugsi DA, Dimbuene ZT, Kimani-Murage EW, Mberu B, Ezeh AC. Differential effects of dietary  
522 diversity and maternal characteristics on linear growth of children aged 6-59 months in sub-Saharan  
523 Africa: a multi-country analysis. *Public health nutrition*. 2017;20(6):1029-45.
- 524 13. Keino S, Plasqui G, Etyyang G, van den Borne B. Determinants of stunting and overweight among  
525 young children and adolescents in sub-Saharan Africa *Food Nutr Bull*. 2014;35(2):167-78.
- 526 14. Rachmi CN, Agho KE, Li M, Baur LA. Stunting, Underweight and Overweight in Children Aged 2.0-  
527 4.9 Years in Indonesia: Prevalence Trends and Associated Risk Factors *PloS one*. 2016;11(5):e0154756.
- 528 15. Felisbino-Mendes MS, Villamor E, Velasquez-Melendez G. Association of maternal and child  
529 nutritional status in Brazil: a population based cross-sectional study *PloS one*. 2014;9(1):e87486.
- 530 16. Subramanian SV, Ackerson LK, Davey Smith G, John NA. Association of Maternal Height With  
531 Child Mortality, Anthropometric Failure, and Anemia in India *JAMA*2009. 2009;301(16):1691-701.

- 532 17. Negash C, Whiting SJ, Henry CJ, Belachew T, Hailemariam TG. Association between Maternal and  
533 Child Nutritional Status in Hula, Rural Southern Ethiopia: Across Sectional Study PloS one.  
534 2015;10(11):e0142301.
- 535 18. Sonkaria L, Zafer A, Gaur KL, Manohar RK. Maternal Factors Associated with Nutritional Status of  
536 1-5 years Children Residing in Field Practice Area of Rural Health Training Centre Naila, Jaipur  
537 (Rajasthan) India Natl J Community Med 2014;5(3):283-7.
- 538 19. Finlay JE, Özaltin E, Canning D. The association of maternal age with infant mortality, child  
539 anthropometric failure, diarrhoea and anaemia for first births: evidence from 55 low- and middle-  
540 income countries BMJ Open. 2011;1(2).
- 541 20. Fall CH, Sachdev HS, Osmond C, Restrepo-Mendez MC, Victora C, Martorell R, et al. COHORTS  
542 investigators. Association between maternal age at childbirth and child and adult outcomes in the  
543 offspring: a prospective study in five low-income and middle-income countries (COHORTS collaboration)  
544 Lancet Glob Health. 2015;3(7):e366-77.
- 545 21. Amugsi DA, Mittelmark MB, Lartey A. Dietary Diversity is a Predictor of Acute Malnutrition in  
546 Rural but Not in Urban Settings: Evidence from Ghana British Journal of Medicine and Medical Research.  
547 2014;4(25):4310-24.
- 548 22. Gaillard R, Rurangirwa Akashi A, Williams Michelle A, Hofman A, Mackenbach Johan P, Franco  
549 Oscar H, et al. Maternal Parity, Fetal and Childhood Growth, and Cardiometabolic Risk Factors.  
550 Hypertension. 2014;64(2):266-74.
- 551 23. Thuita FM, Mwadime RKN, Wang'ombe JK. Child nutritional status and maternal factors in an  
552 urban slum in Nairobi, Kenya East African Medical Journal 2005;82(4):209-15.
- 553 24. Kuhnt J, Vollmer S. Antenatal care services and its implications for vital and health outcomes of  
554 children: evidence from 193 surveys in 69 low-income and middle-income countries. BMJ open.  
555 2017;7(11):e017122-e.
- 556 25. WHO. Continued breastfeeding for healthy growth and development of children 2019 [cited  
557 2019 03.09]. Available from: [https://www.who.int/elena/titles/continued\\_breastfeeding/en/](https://www.who.int/elena/titles/continued_breastfeeding/en/).
- 558 26. Yan J, Liu L, Zhu Y, Huang G, Wang PP. The association between breastfeeding and childhood  
559 obesity: a meta-analysis. BMC public health. 2014;14:1267-.
- 560 27. Kramer MS, Aboud F, Mironova E, Vanilovich I, Platt RW, Matush L, et al. Breastfeeding and child  
561 cognitive development: new evidence from a large randomized trial. Archives of general psychiatry.  
562 2008;65(5):578-84.
- 563 28. Hong R, Banta JE, Betancourt JA. Relationship between household wealth inequality and chronic  
564 childhood under-nutrition in Bangladesh. International journal for equity in health. 2006;5:15-.
- 565 29. Hong R, Mishra V. Effect of wealth inequality on chronic under-nutrition in Cambodian children.  
566 Journal of health, population, and nutrition. 2006;24(1):89-99.
- 567 30. Mostafa Kamal SM, Jr., Rosliza AM, Aynul M. Effects of Wealth on Nutritional Status of Pre-  
568 school Children in Bangladesh. Malaysian journal of nutrition. 2010;16(2):219-32.
- 569 31. The DHS Program. Demographic and Health Surveys [Available from:  
570 <http://dhsprogram.com/data/available-datasets.cfm>.
- 571 32. Amugsi DA, Dimbuene ZT, Kyobutungi C. Correlates of the double burden of malnutrition among  
572 women: an analysis of cross sectional survey data from sub-Saharan Africa. BMJ Open.  
573 2019;9(7):e029545.
- 574 33. The DHS Program. Demographic and Health Surveys [cited 2018 06.09]. Available from:  
575 [https://dhsprogram.com/data/dataset\\_admin/download-datasets.cfm](https://dhsprogram.com/data/dataset_admin/download-datasets.cfm) [
- 576 34. The DHS Program. DHS Methodology [Available from: [http://dhsprogram.com/What-We-](http://dhsprogram.com/What-We-Do/Survey-Types/DHS-Methodology.cfm)  
577 [Do/Survey-Types/DHS-Methodology.cfm](http://dhsprogram.com/What-We-Do/Survey-Types/DHS-Methodology.cfm).
- 578 35. Ghana Statistical Service (GSS), Ghana Health Service (GHS), ICF Macro. GhanaDemographic and  
579 Health Survey 2008 Accra, Ghana: GSS, GHS, and ICF Macro; 2009.

- 580 36. Ministry of Health and Social Services (MoHSS), Macro International Inc. Namibia Demographic  
581 and Health Survey 2006-07 Windhoek, Namibia and Calverton, Maryland, USA: MoHSS and Macro  
582 International Inc. ; 2008.
- 583 37. Ghana Statistical Service (GSS), Ghana Health Service (GHS), ICF International. Ghana  
584 Demographic and Health Survey 2014. Rockville, Maryland, USA: GSS, GHS, and ICF International.; 2015.
- 585 38. National Population Commission (NPC) [Nigeria], ICF International. Nigeria Demographic and  
586 Health Survey 2013. Abuja, Nigeria, and Rockville, Maryland, USA: NPC and ICF International. . 2014.
- 587 39. National Bureau of Statistics-Kenya, ICF International. 2014 KDHS Key Findings. Rockville,  
588 Maryland, USA: KNBS and ICF International. 2015.
- 589 40. WHO Multicentre Growth Reference Study Group. WHO Child Growth Standards based on  
590 length/height, weight and age *Acta paediatrica* (Oslo, Norway : 1992) Supplement. 2006;450:76-85.
- 591 41. Faye CM, Fonn S, Levin J, Kimani-Murage E. Analysing child linear growth trajectories among  
592 under-5 children in two Nairobi informal settlements. *Public health nutrition*. 2019;22(11):2001-11.
- 593 42. Food and Agricultural Organisation. FAO Guidelines for measuring household and individual  
594 dietary diversity 2012 [Available from: <http://www.fao.org/docrep/014/i1983e/i1983e00.htm>].
- 595 43. Eknoyan G. Adolphe Quetelet (1796 –1874) - the average man and indices of obesity . *Nephrol  
596 Dial Transplant* 2008;23:47-51.
- 597 44. World Health Organization. BMI classification: WHO; 2006 [Available from:  
598 [http://apps.who.int/bmi/index.jsp?introPage=intro\\_3.html](http://apps.who.int/bmi/index.jsp?introPage=intro_3.html)].
- 599 45. The Namibia Ministry of Health and Social Services (MoHSS) and ICF International, International.  
600 The Namibia Demographic and Health Survey 2013 Windhoek, Namibia, and Rockville, Maryland, USA:  
601 MoHSS and ICF. 2014.
- 602 46. UNICEF. The State of World's Children: Causes of Child Malnutrition 1998 [Available from:  
603 <https://www.unicef.org/sowc98/fig5.htm>].
- 604 47. Zanello G, Srinivasan CS, Shankar B. What Explains Cambodia's Success in Reducing Child  
605 Stunting-2000-2014? *PloS one*. 2016;11(9):e0162668.
- 606 48. Smith LC, Ruel MT, Ndiaye A. Why is child malnutrition lower in urban than in rural areas?  
607 Evidence from 36 developing countries *World Devel*. 2005;33(8):1285-305.
- 608 49. Sastry N. What explains rural-urban differentials in child mortality in Brazil? *Social science &  
609 medicine* (1982). 1997;44(7):989-1002.
- 610 50. Rollins NC, Bhandari N, Hajeerhoy N, Horton S, Lutter CK, Martines JC, et al. Why invest, and  
611 what it will take to improve breastfeeding practices? *Lancet*. 2016;387(10017):491-504.
- 612 51. Abrha S, Shiferaw S, Ahmed KY. Overweight and obesity and its socio-demographic correlates  
613 among urban Ethiopian women: evidence from the 2011 EDHS *BMC Public Health*. 2016;636.
- 614 52. Agyemang C, Owusu-Dabo E, de Jonge A, Martins D, Ogedegbe G, Stronks K. Overweight and  
615 obesity among Ghanaian residents in The Netherlands: how do they weigh against their urban and rural  
616 counterparts in Ghana? *Public health nutrition* 2008.
- 617 53. Amugsi DA, Dimbuene ZT, Mberu B, Muthuri S, Ezeh AC. Prevalence and time trends in  
618 overweight and obesity among urban women: an analysis of demographic and health surveys data from  
619 24 African countries, 1991–2014. *BMJ Open*. 2017;7(10):e017344.
- 620 54. Addai I. Determinants of use of maternal-child health services in rural Ghana. *Journal of  
621 biosocial science*. 2000;32(1):1-15.
- 622 55. Zegeye EA, Mbonigaba J, Dimbuene ZT. Factors associated with the utilization of antenatal care  
623 and prevention of mother-to-child HIV transmission services in Ethiopia: applying a count regression  
624 model. *BMC women's health*. 2018;18(1):187.
- 625 56. Richman AL, Miller PM, LeVine RA. Cultural and educational variations in maternal  
626 responsiveness. *Developmental Psychology*. 1992;28(4):614-21.

- 627 57. NICHD. Early Child Care Research Network. Child care and mother-child interaction in the first 3  
628 years of life. *NICHD Early Child Care Research Network Dev Psychol* 1999;35(6):1399-413. .
- 629 58. Marquis GS, Habicht JP, Lanata CF, Black RE, Rasmussen KM. Association of breastfeeding and  
630 stunting in Peruvian toddlers: an example of reverse causality. *International journal of epidemiology*.  
631 1997;26(2):349-56.
- 632 59. Amugsi DA, Mittelmark MB, Lartey A, Matanda DJ, Urke HB. Influence of childcare practices on  
633 nutritional status of Ghanaian children: a regression analysis of the Ghana Demographic and Health  
634 Surveys. *BMJ Open*. 2014;4.
- 635 60. Mulder-Sibanda M, Sibanda-Mulder FS. Prolonged breastfeeding in Bangladesh: indicators of  
636 inadequate feeding practices or mothers' response to children's poor health? *Public Health*.  
637 1999;113(2):65-8.
- 638 61. Nair M, Ariana P, Webster P. Impact of mothers' employment on infant feeding and care: a  
639 qualitative study of the experiences of mothers employed through the Mahatma Gandhi National Rural  
640 Employment Guarantee Act. *BMJ Open*. 2014;4(4):e004434.
- 641 62. Abbi R, Christian P, Gujral S, Gopaldas T. The impact of maternal work on the nutrition and  
642 health status of children *Food and Nutrition Bulletin* 1991;13(1):20-4.
- 643 63. Popkin BM. Time allocation of the mother and child nutrition. *Ecology of Food and Nutrition*  
644 1980;9:1-14.
- 645 64. Sharaf MF, Rashadb AS. Economic and Socio-Demographic Determinants of Child Nutritional  
646 Status in Egypt: A Comprehensive Analysis using Quantile Regression Approach. Working Paper No.  
647 2016-04: University of Alberta 2016 [Available from: [http://www.ualberta.ca/~econwps/2016/wp2016-](http://www.ualberta.ca/~econwps/2016/wp2016-04.pdf)  
648 04.pdf.
- 649 65. Abuya BA, Ciera J, Kimani-Murage E. Effect of mother's education on child's nutritional status in  
650 the slums of Nairobi *BMC Pediatr* 2012;12:80.
- 651 66. Zerihun T, Larson CP, Hanley JA. Anthropometric status of Oromo women of child bearing age in  
652 rural south-western Ethiopia *Ethiopian Journal of Health Development* 1997;11(3):1-7.
- 653 67. Teller H, Yimar G. Levels and determinants of malnutrition in adolescent and adult women in  
654 southern Ethiopia *Ethiopian Journal of Health Development* 2000;14(1):57-66.
- 655 68. Nshimiyiryo A, Hedt-Gauthier B, Mutaganzwa C, Kirk CM, Beck K, Ndayisaba A, et al. Risk factors  
656 for stunting among children under five years: a cross-sectional population-based study in Rwanda using  
657 the 2015 Demographic and Health Survey. *BMC Public Health*. 2019;19(1):175.
- 658 69. Mzumara B, Bwembya P, Halwiindi H, Mugode R, Banda J. Factors associated with stunting  
659 among children below five years of age in Zambia: evidence from the 2014 Zambia demographic and  
660 health survey. *BMC Nutrition*. 2018;4(1):51.
- 661 70. Wamani H, Astrom AN, Peterson S, Tumwine JK, Tylleskar T. Boys are more stunted than girls in  
662 sub-Saharan Africa: a meta-analysis of 16 demographic and health surveys. *BMC Pediatr*. 2007;7:17.
- 663 71. Condo JU, Gage A, Mock N, Rice J, Greiner T. Sex differences in nutritional status of HIV-exposed  
664 children in Rwanda: a longitudinal study. *Tropical medicine & international health : TM & IH*.  
665 2015;20(1):17-23.

666

667
